# Supplementary figures and images for: Sequential and γ-secretase-dependent processing of the betacellulin precursor generates a palmitoylated intracellular-domain fragment that inhibits cell growth
Source: Oxford University Press journal article supplement (doi:10.1242/jcs.060830), 2010-06-09

**A**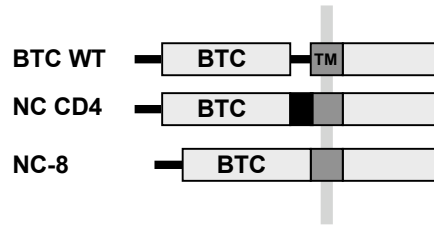**B**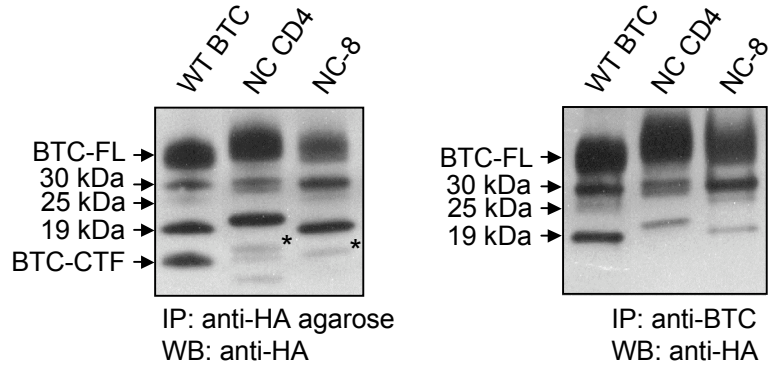**C**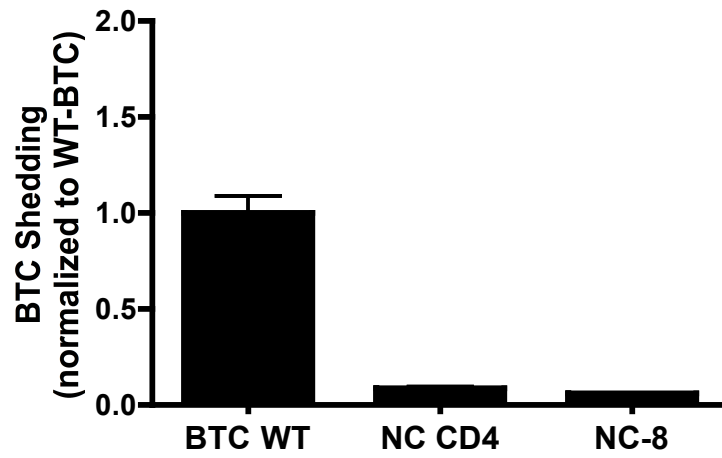**D**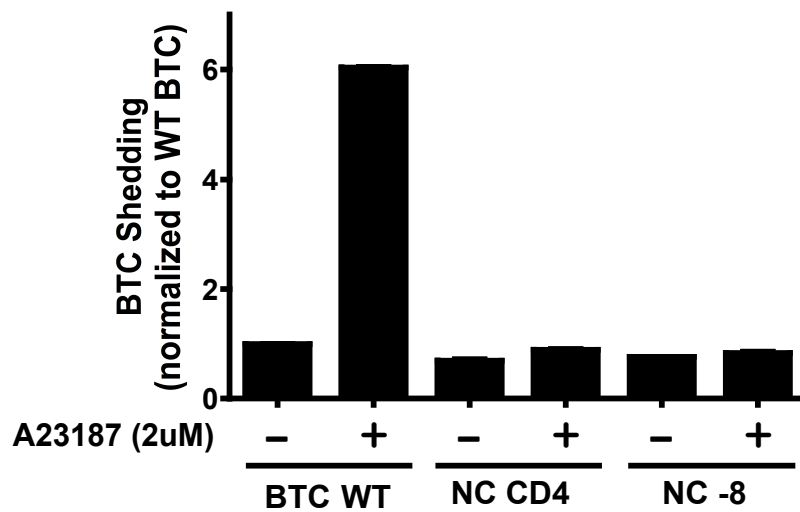

Supplement: jcs060830-sup-060830figs1.pdf [file jcs060830-sup-060830figs1.pdf]

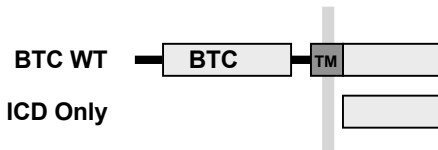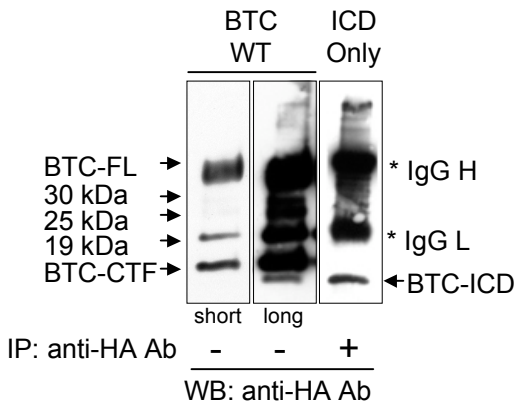

Supplement: jcs060830-sup-060830figs2.pdf [file jcs060830-sup-060830figs2.pdf]

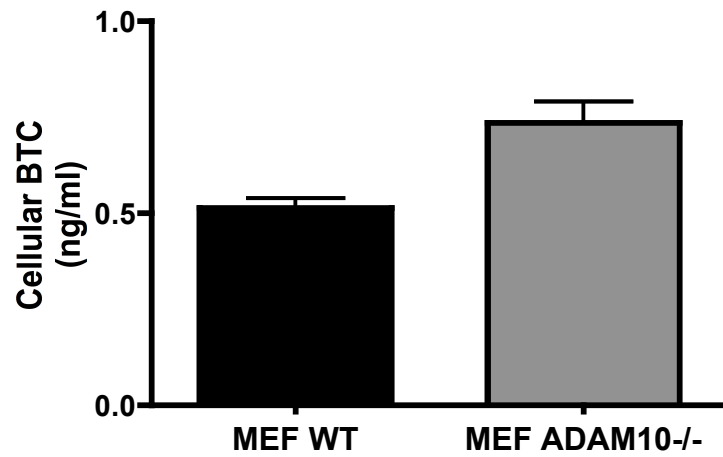

Supplement: jcs060830-sup-060830figs3.pdf [file jcs060830-sup-060830figs3.pdf]

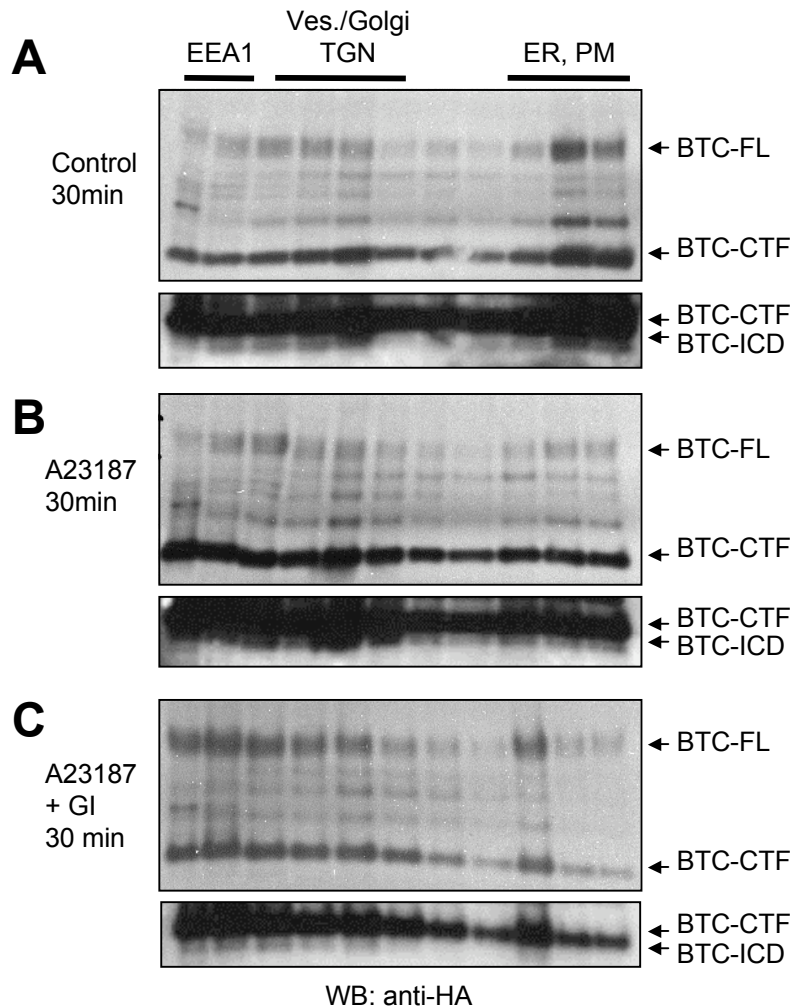

Supplement: jcs060830-sup-060830figs4.pdf [file jcs060830-sup-060830figs4.pdf]

**A**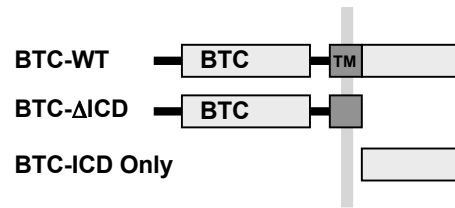**B**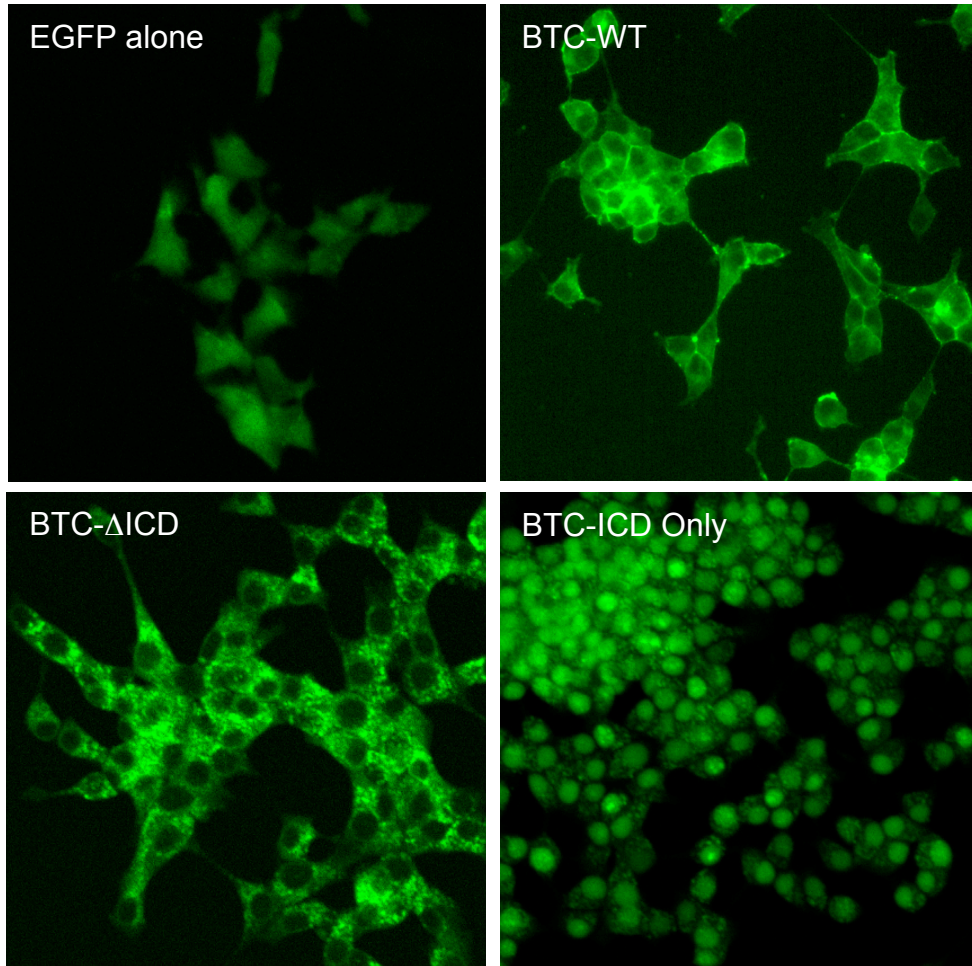**C**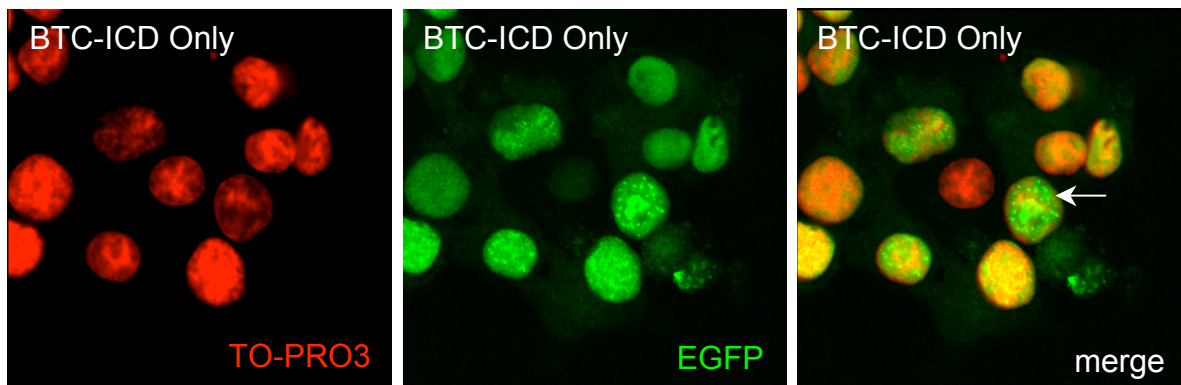

Supplement: jcs060830-sup-060830figs5.pdf [file jcs060830-sup-060830figs5.pdf]

**A**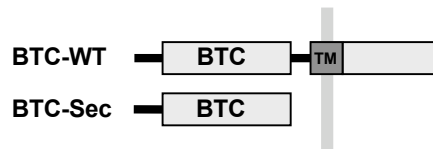**B**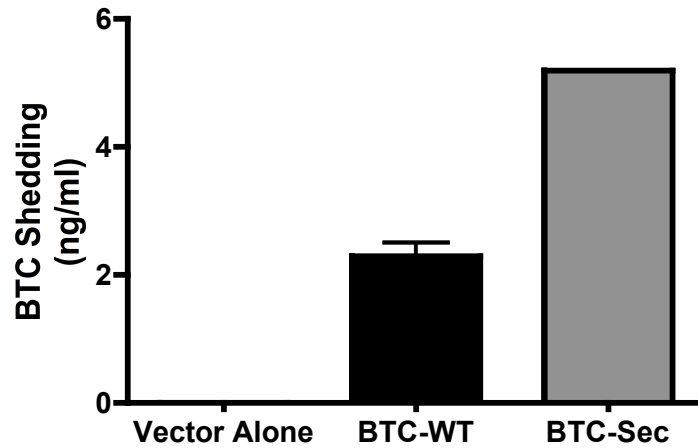**C**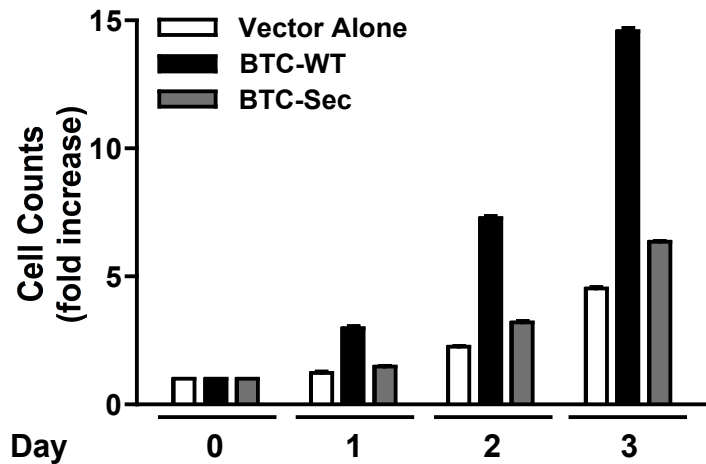

Supplement: jcs060830-sup-060830figs6.pdf [file jcs060830-sup-060830figs6.pdf]
